# Supplementary material
Source: PubMed Central journal article supplement (PMC5828006)
Supplement: NIHMS943078-supplement-si.pdf [file NIHMS943078-supplement-si.pdf]

## **SUPPORTING INFORMATION:**

### **RNA Polymerase Tags To Monitor Multidimensional Protein-Protein Interactions Reveal Pharmacological Engagement of Bcl-2 Proteins**

Jinyue Pu<sup>†</sup>, Jeffrey A. Dewey<sup>†</sup>, Abbas Hadji<sup>‡</sup>, James L. LaBelle<sup>‡</sup>, Bryan C. Dickinson<sup>†\*</sup>

<sup>†</sup>Department of Chemistry, The University of Chicago, Chicago, IL 60637,

<sup>‡</sup>Section of Hematology, Oncology, Stem Cell Transplantation, Department of Pediatrics, The University of Chicago, Comer Children's Hospital, Chicago, IL, 60637

\*Corresponding author. Email address: [Dickinson@uchicago.edu](mailto:Dickinson@uchicago.edu) (Bryan C. Dickinson)

**Table S1 | List of plasmids used in this work.**

| <b>Vector Name</b> | <b>Antibiotic resistance</b> | <b>Origin</b> | <b>Purpose</b>                                                            | <b>Map</b> |
|--------------------|------------------------------|---------------|---------------------------------------------------------------------------|------------|
| p2-22              | Carb                         | SC101         | P <sub>T7</sub> luciferase reporter plasmid                               | a*         |
| p2-64              | Carb                         | SC101         | P <sub>CGG</sub> luciferase reporter plasmid                              | a          |
| pJin242            | Carb                         | SC101         | P <sub>K1F</sub> luciferase reporter plasmid                              | a          |
| pJin243            | Carb                         | SC101         | P <sub>CTGA</sub> luciferase reporter plasmid                             | a          |
| pJin244            | Carb                         | SC101         | P <sub>T3</sub> luciferase reporter plasmid                               | a          |
| p2-39              | Chlor                        | CloDF13       | ZB-linker-T7 RNAP <sub>C</sub> expression plasmid                         | b          |
| p3-13              | Chlor                        | CloDF13       | ZB-linker-CGG RNAP <sub>C</sub> expression plasmid                        | b          |
| pJin 245           | Chlor                        | CloDF13       | ZB-linker-T3 RNAP <sub>C</sub> expression plasmid                         | b          |
| pJin 246           | Chlor                        | CloDF13       | ZB-linker-T3-R RNAP <sub>C</sub> expression plasmid                       | b          |
| pJin 247           | Chlor                        | CloDF13       | ZB-linker-K1F-a RNAP <sub>C</sub> expression plasmid                      | b          |
| pJin 248           | Chlor                        | CloDF13       | ZB-linker-K1F-b RNAP <sub>C</sub> expression plasmid                      | b          |
| pJin 249           | Chlor                        | CloDF13       | ZB-linker-K1F-c RNAP <sub>C</sub> expression plasmid                      | b          |
| pJin 252           | Chlor                        | CloDF13       | ZB-linker-CTGA RNAP <sub>C</sub> expression plasmid                       | b          |
| p5-74              | Spec                         | P15a          | T7 RNAP <sub>N</sub> (N-29-1)-linker-ZA (I13I, L20I) expression plasmid   | c          |
| p9-02              | Spec                         | P15a          | T7 RNAP <sub>N</sub> (N-29-1) expression plasmid                          | d          |
| p10-54             | Chlor                        | CloDF13       | (Bcl-2)-linker-T7 RNAP <sub>C</sub> expression plasmid                    | e          |
| p7-77              | Chlor                        | CloDF13       | (Mcl-1)-linker-T7 RNAP <sub>C</sub> expression plasmid                    | e          |
| p7-78              | Chlor                        | CloDF13       | (Bcl-W)-linker-T7 RNAP <sub>C</sub> expression plasmid                    | e          |
| p7-79              | Chlor                        | CloDF13       | (Bcl-X <sub>L</sub> )-linker-T7 RNAP <sub>C</sub> expression plasmid      | e          |
| p8-1               | Spec                         | P15a          | T7 RNAP <sub>N</sub> (N-29-1**)-linker-tBID expression plasmid            | f          |
| p8-35              | Spec                         | P15a          | T7 RNAP <sub>N</sub> (N-29-1)-linker-NOXA expression plasmid              | f          |
| p9-27              | Spec                         | P15a          | T7 RNAP <sub>N</sub> (N-29-1)-linker-deadBID expression plasmid           | f          |
| p9-49              | Kan                          | pBR322        | T7 RNAP <sub>N</sub> (N-29-1)-linker-tBID mammalian expression plasmid    | g          |
| p9-51              | Kan                          | pBR322        | T7 RNAP <sub>N</sub> (N-29-1)-linker-NOXA mammalian expression plasmid    | g          |
| p9-52              | Kan                          | pBR322        | T7 RNAP <sub>N</sub> (N-29-1)-linker-deadBID mammalian expression plasmid | g          |
| p11-19             | Kan                          | pBR322        | T7 RNAP <sub>N</sub> (D5-18)-linker-tBID mammalian expression plasmid     | g          |
| p10-50             | Kan                          | pBR322        | T7 RNAP <sub>N</sub> (D5-18)-linker-NOXA mammalian expression plasmid     | g          |
| p11-20             | Kan                          | pBR322        | T7 RNAP <sub>N</sub> (D5-18)-linker-deadBID mammalian expression plasmid  | g          |

|        |     |        |                                                                                                 |   |
|--------|-----|--------|-------------------------------------------------------------------------------------------------|---|
| p9-54  | Kan | pBR322 | (Bcl-X <sub>L</sub> )-linker-T7 RNAP <sub>C</sub> , P <sub>T7</sub> -GFP expression plasmid     | h |
| p9-61  | Kan | pBR322 | (Bcl-W)-linker-T7 RNAP <sub>C</sub> , P <sub>T7</sub> -GFP expression plasmid                   | h |
| p9-65  | Kan | pBR322 | (Mcl-1)-linker-T7 RNAP <sub>C</sub> , P <sub>T7</sub> -GFP expression plasmid                   | h |
| p10-53 | Kan | pBR322 | (Bcl-2)-linker-T7 RNAP <sub>C</sub> , P <sub>T7</sub> -GFP(RNA-1) expression plasmid            | h |
| p9-53  | Kan | pBR322 | (Mcl-1)-linker-CGG RNAP <sub>C</sub> , P <sub>CGG</sub> -RFP expression plasmid                 | i |
| p10-52 | Kan | pBR323 | (Mcl-1)-linker-T3 RNAP <sub>C</sub> , P <sub>T3</sub> -RNA-2 expression plasmid                 | j |
| p12-75 | Kan | pBR324 | (Bcl-X <sub>L</sub> )-linker-K1F RNAP <sub>C</sub> , P <sub>K1F</sub> -RNA-4 expression plasmid | l |
| p11-63 | Kan | pBR325 | (Bcl-W)-linker-CTGA RNAP <sub>C</sub> , P <sub>CTGA</sub> -RNA-3 expression plasmid             | k |

\* Vector maps for each construct type shown in Figure S1.

\*\* RNAP<sub>N</sub> mutation sites:

**N-29-1:** L32S, E35G, K98R, Q107K, T122S, A144T

**D5-18:** L24R, L32S, E35G, R57C, E63K, K98R, Q104K, Q107K, T122S, A144T

**Table S2 | List of sequences of split RNAP fusions.** The structures and amino acid sequences of the pro- and anti-apoptotic protein fusions used in this study.

| Name                 | peptide sequence                                                                                                                                                                                                                                          |
|----------------------|-----------------------------------------------------------------------------------------------------------------------------------------------------------------------------------------------------------------------------------------------------------|
| N-tBID               | RNAP(1-179)–GGSGSGSS–SQEDIIRNIARHLAQVGDSDMDRSIPPG                                                                                                                                                                                                         |
| N-NOXA               | RNAP(1-179)–GGSGSGSS–PADLKDECAQLRRIGDKVNLQRKLLNM                                                                                                                                                                                                          |
| N-dBID               | RNAP(1-179)–GGSGSGSS–SQEDQVGDSDMDRSIPPG                                                                                                                                                                                                                   |
| C-Bcl-2              | MAHAGRTGYDNREIVMKYIHYKLSQRGYEWDAGDVGAAPPGAAPAPGIFSSQPGHTPH<br>PAASRDVPARTSPLQTPAAPGAAAGPALSPVPPVVHLTLRQAGDDFSRRYRRDFAEMS<br>SQLHLTPFTARGRFATVVEELFRDGVNWGRIVAFFEFGGVMCVESVNRMSPLVDNIAL<br>WMTEYLNRLHTWIQDNGGWDAFVELYGPSMRPLDFSWLSLK–TSGGSG–<br>RNAP(180+) |
| C-Mcl-1              | MEAPAADAIMSPEEELDGYEPEPLGKRPAVLPLELVGESGNNTSTDGSLPSTPPPAEE<br>EEDELYRQSLEIISRYLREQATGAKDTKPMGRSGATSRKALETLLRVGDGVQRNHETVF<br>QGMLRKLDIKNEDDVKSLSRVMIHVFSDBGVTNWGRIVTLISFGAFVAKHLKTINQESCIEP<br>LAESITDVLVTRTKRDWLVKQRGWDFVEFFHVEDLEGGIR–TSGGSG–RNAP(180+) |
| C-Bcl-W              | MATPASAPDTRALVADFVGYKLRQKGYVCGAGPGEGPAADPLHQAMRAAGDEFETRF<br>RRTFSDLAAQLHVTPGSAQQRFTQVSDELFGGPNWGRLVAFFVFGAALCAESVNKEM<br>EPLVGQVQEWVAYLETRLADWIHSSGGWAEFTALYGDGALEEARRLREGNWASVR–<br>TSGGSG–RNAP(180+)                                                   |
| C-Bcl-X <sub>L</sub> | MSQSNRELVVDFLSYKLSQKGYSWSQFSDVEENRTEAPEGTESEMETPSAINGNPSWH<br>LADSPAVNGATGHSSSLDAREVIPMAAVKQALREAGDEFELRYRRAFSDLTSQLHITPGT<br>AYQSFEQVVNELFRDGVNWGRIVAFFSFGGALCVESVDKEMQVLVSRIAAWMATYLND<br>HLEPWIQENGGWDTFVELYGNNAAAESRKGQERFNR–TSGGSG–RNAP(180+)        |
| ZA (L13I,<br>L20I)   | ALKKELQANKKEIAQLKWEIQALKKELAQ                                                                                                                                                                                                                             |
| ZB                   | MASEQLEKKLQALEKKLAQLEWKNQALEKKLAQ                                                                                                                                                                                                                         |

**Table S3 | List of sequences of RNA templates and primers for one-by-four qPCR assays.**

| Name             | DNA sequence or oligo sequence                                                                                                                                                                                                                                                                                                                                                                                                                                                                                                                                                                                                                                                                                                                                                                   |
|------------------|--------------------------------------------------------------------------------------------------------------------------------------------------------------------------------------------------------------------------------------------------------------------------------------------------------------------------------------------------------------------------------------------------------------------------------------------------------------------------------------------------------------------------------------------------------------------------------------------------------------------------------------------------------------------------------------------------------------------------------------------------------------------------------------------------|
| RNA-1 template   | ATGGTGAGCAAGGGCGAGGAGCTGTTACCGGGGTGGTGCCATCCTGGT<br>CGAGCTGGACGGCGACGTAACGGCCACAAGTTCAGCGTGTCCGGCGAGG<br>GCGAGGGCGATGCCACCTACGGCAAGCTGACCCTGAAGTTCATCTGCACCA<br>CCGGCAAGCTGCCCCTGCCCTGGCCACCCTCGTGACCACCCTGACCTAC<br>GGCGTGCAAGTGTTCAGCCGCTACCCCGACCACATGAAGCAGCAGACTTC<br>TTCAAGTCCGCCATGCCCGAAGGCTACGTCCAGGAGCGCACCATCTTCTTC<br>AAGGACGACGGCAACTACAAGACCCGCGCCGAGGTGAAGTTCGAGGGCGA<br>CACCCTGGTGAACCGCATCGAGCTGAAGGGCATCGACTTCAAGGAGGACG<br>GCAACATCCTGGGGCACAAGCTGGAGTACAACACTACAACAGCCACAACGTCT<br>ATATCATGGCCGACAAGCAGAAGAACGGCATCAAGGTGAACCTCAAGATCC<br>GCCACAACATCGAGGACGGCAGCGTGCAGCTCGCCGACCCTACCAGCAG<br>AACACCCCATCGGCGACGGCCCGTGTGCTGCTGCCCGACAACCCTACCT<br>GAGCACCCAGTCCGCCCTGAGCAAAGACCCCAACGAGAAGCGCGATCACAT<br>GTCTGCTGGAGTTCGTGACCGCCGCGGGATCACTCTCGGCATGGACG<br>AGCTGTACAAGTAA |
| RNA-1-primer-for | TGACCCTGAAGTTCATCTGC                                                                                                                                                                                                                                                                                                                                                                                                                                                                                                                                                                                                                                                                                                                                                                             |
| RNA-1-primer-rev | GAAGTCGTGCTGCTTCATGT                                                                                                                                                                                                                                                                                                                                                                                                                                                                                                                                                                                                                                                                                                                                                                             |
| RNA-2 template   | ATGGCCTCCTCCGAGGACGTCATCAAGGAGTTCATGCGCTTCAAGGTGCGC<br>ATGGAGGGCTCCGTGAACGGCCACGAGTTCGAGATCGAGGGCGAGGGCGA<br>GGGCCGCCCTACGAGGGCACCCAGACCGCCAAGCTGAAGGTGACCAAGG<br>GCGGCCCTTGCCTTTCGCTGGGACATCCTGTCCCCTCAGTTCCAGTACG<br>GCTCCAAGGCCTACGTGAAGCACCCCGCCGACATCCCCGACTACTTGAAGC<br>TGTCTTCCCCGAGGGCTTCAAGTGGGAGCGCGTGATGAACTTCGAGGACG<br>GCGGCGTGGTGACCGTGACCCAGGACTCCTCCCTGCAGGACGGCGAGTTC<br>ATCTACAAGGTGAAGCTGCGCGGCACCAACTTCCCCTCCGACGGCCCGTA<br>ATGCAGAAGAAGACCATGGGCTGGGAGGCCTCCACCGAGCGGATGTACCC<br>CGAGGACGGCGCCCTGAAGGGCGAGATCAAGATGAGGCTGAAGCTGAAGG<br>ACGGCGGCCACTACGACGCCGAGGTCAAGACCACCTACATGGCCAAGAAG<br>CCCGTGCAGCTGCCCGGCGCCTACAAGACCGACATCAAGCTGGACATCACC<br>TCCCACAACGAGGACTACACCATCGTGGAAACAGTACGAGCGCGCCGAGGG<br>CCGCCACTCCACCGGCGCCTAA                                           |
| RNA-2-primer-for | CGCGCAGCTTACCTTGTAG                                                                                                                                                                                                                                                                                                                                                                                                                                                                                                                                                                                                                                                                                                                                                                              |
| RNA-2-primer-rev | GGAGCGCGTGATGAACTTCG                                                                                                                                                                                                                                                                                                                                                                                                                                                                                                                                                                                                                                                                                                                                                                             |
| RNA-3 template   | ATGGTGAGCAAGGGCGAGGAGCTGTTACCGGGGTGGTGCCATCCTGGT<br>CGAGCTGGACGGCGACAAACGTTTGGTTAAATTAGGTTCGCATCTCTGAGGA<br>GTGTGGTTTTGATACCGTATGGTTACTGGAGCATCATTTACGGAGTTTGGT<br>TTGCTTGGTAACCCTTATGTGCTGCTGCATATTTACTTGGCGGACTAAAA<br>AATTGAATGTAGGAAGTCCGCTATTGTTCTTCCCACAGCCCATCCAGTACG<br>CCAACTTGAAGATGTGAATTTATTGGATCAAATGTCAAAGGACGATTTCCGT<br>TTGGTATTTGCCGAGGGCTTTACAACAAGGACTTTTCGCGTATTCGGCACAGA<br>TATGAATAACAGTTCGCGCCTTAGCGGAATGCTGGTACGGGCTGATAAAGAAT<br>GGCATGACAGAGGGATATATGGAAGCTGATAATGAACATATCAAGTTCATA<br>AGGTAAAAGTAAACCCCGCGGCGTATAGCAGAGGTGGCGCACCGGTTTATG<br>TGGTGGCTGAATCAGTTTCGACGACTGAGTGGGCTGCTCAATTTGGCCTAC<br>CGATGATATTAAGTTGGATTATAAATACTAACGAAAAGAAAGCACAACCTGAG<br>CTTTATAATGAAGTGGTCTGCTGGAGTTCGTGACCGCCGCGGGATCACT<br>CTCGGCATGGACGAGCTGTACAAGTAA                         |
| RNA-3-primer-for | GTAGGAACTGCCGCTATTGT                                                                                                                                                                                                                                                                                                                                                                                                                                                                                                                                                                                                                                                                                                                                                                             |
| RNA-3-primer-rev | TACGCGAAAGTCCTTGTGTAA                                                                                                                                                                                                                                                                                                                                                                                                                                                                                                                                                                                                                                                                                                                                                                            |

|                    |                                                                                                                                                                                                                                                                                                                                                                                                                                                                                                                                                                                                                                                                                                                                                             |
|--------------------|-------------------------------------------------------------------------------------------------------------------------------------------------------------------------------------------------------------------------------------------------------------------------------------------------------------------------------------------------------------------------------------------------------------------------------------------------------------------------------------------------------------------------------------------------------------------------------------------------------------------------------------------------------------------------------------------------------------------------------------------------------------|
| RNA-4 template     | ATGGTGAGCAAGGGCGAGGAGCTGTTACCGGGGTGGTGCCCATCCTGGT<br>CGAGCTGGACGGCGACGAAGACTGTTTATATTTGAACATCTATACTCCCGCT<br>GATCTGACTAAGCGTGGTCGCCTGCCGTAATGGTTTGGATTCACGGTGA<br>GGCCTGGTGCTTGGGGGTGCGCCCATGTACGACGGCGTTGTTCTTGCTGCA<br>CATGAAAATGTGGTAGTCGTTGCCATCCAGTATCGCTTAGGGATCTGGGGCT<br>TTTTCTCTACCGGAGACGAGCACAGCCGTGGTAATTGGGGACATTTAGATCA<br>GGTCGCCGCCCTGCACTGGGTTCAAGAAAATATCGCCAATTTTGGTGGCGA<br>TCCTGGCAGTGTACGATTTTTGGGGAGTCCGCAGGCGGAGAGTCCGTATC<br>TGTGTTAGTCCTTTCCCGTGGCAAAAATTTATTCCATCGCGCCATTAGTG<br>AATCAGGGGTGCGCGCTGACGGTTGCTTTGGTACGTAAGGACATGAAGGCTG<br>CTGCTAAGCAGATTGCTGTACTGGCTGGATGTAAACTACTACCAGTGCAGT<br>ATTTGTGCATTGCTTACGCCAAAATCAGAGGACGAGCTTCTTGATTTAACGT<br>TGAAGGTCCTGCTGGAGTTCGTGACCGCCGCCGGGATCACTCTCGGCATG<br>GACGAGCTGTACAAGTAA |
| RNA-4-primer-for   | AGCAATGCACAAATACCGCA                                                                                                                                                                                                                                                                                                                                                                                                                                                                                                                                                                                                                                                                                                                                        |
| RNA-4-primer-rev   | TGCTTTGGTACGTAAGGACA                                                                                                                                                                                                                                                                                                                                                                                                                                                                                                                                                                                                                                                                                                                                        |
| GAPDH-primer-for   | TGCACCACCAACTGCTTAGC                                                                                                                                                                                                                                                                                                                                                                                                                                                                                                                                                                                                                                                                                                                                        |
| GAPDH-primer-rev   | GGCATGGACTGTGGTCATGAG                                                                                                                                                                                                                                                                                                                                                                                                                                                                                                                                                                                                                                                                                                                                       |
| T7 RNAP-primer-for | ACCAAAGGACTGCTTACGCT                                                                                                                                                                                                                                                                                                                                                                                                                                                                                                                                                                                                                                                                                                                                        |
| T7 RNAP-primer-rev | TCAGGGAACGGAACCTTATC                                                                                                                                                                                                                                                                                                                                                                                                                                                                                                                                                                                                                                                                                                                                        |

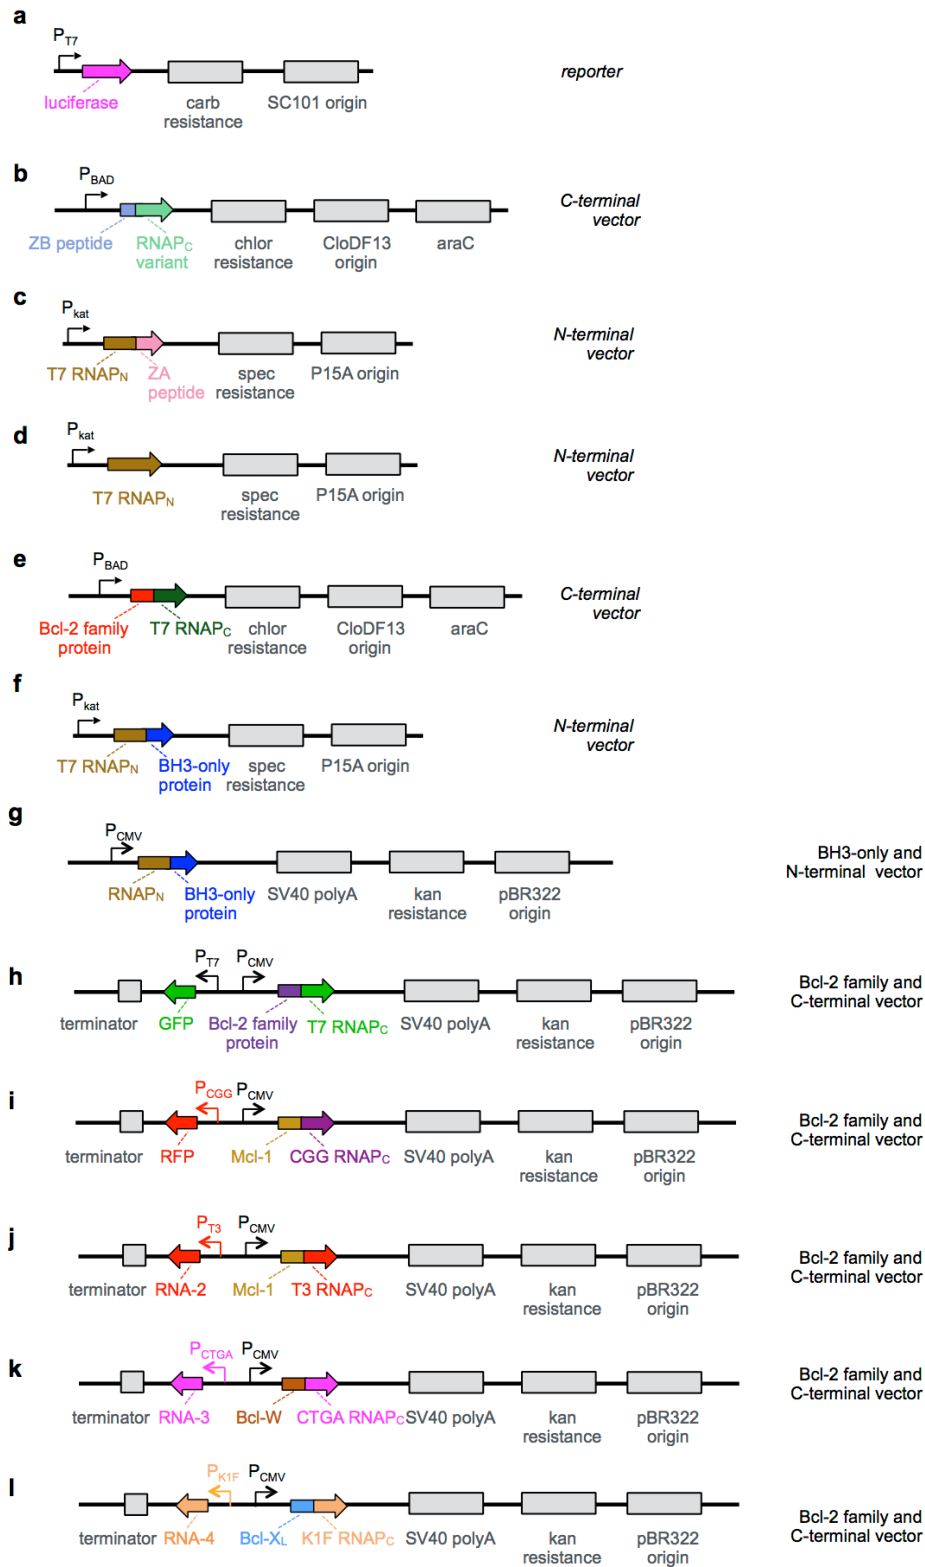

**Figure S1 | Vector maps for all constructs used in this work.** Vector maps corresponding to the vectors listed in Table S1.

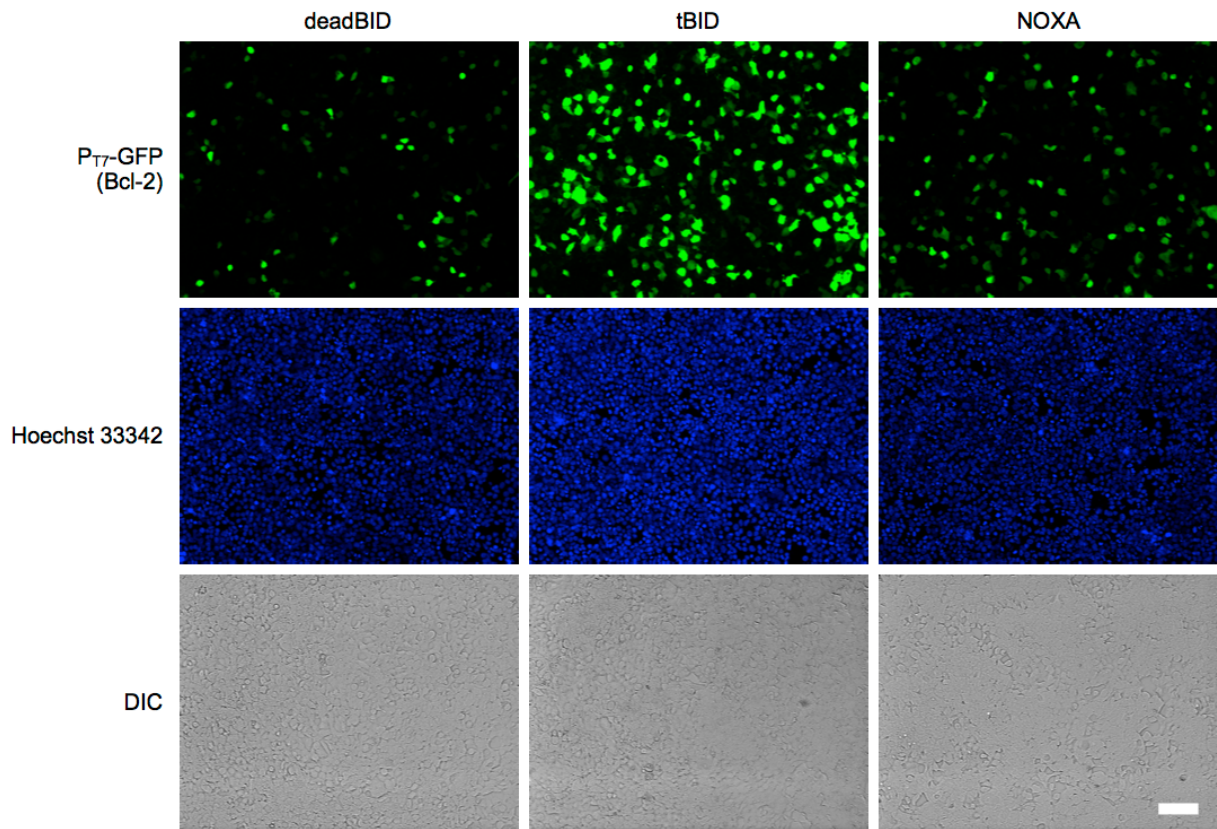

**Figure S2 | Complete imaging series from Figure 2B for Bcl-2.** HEK293T cells cotransfected with the plasmids shown in (Figure 2A) with RNAP<sub>N</sub>-BH3-only protein and Bcl-2-RNAP<sub>C</sub>. 30 h after transfection, the cells were loaded with 1  $\mu$ M Hoechst 33342 and analyzed by fluorescence microscopy. 100  $\mu$ m scale bar shown.



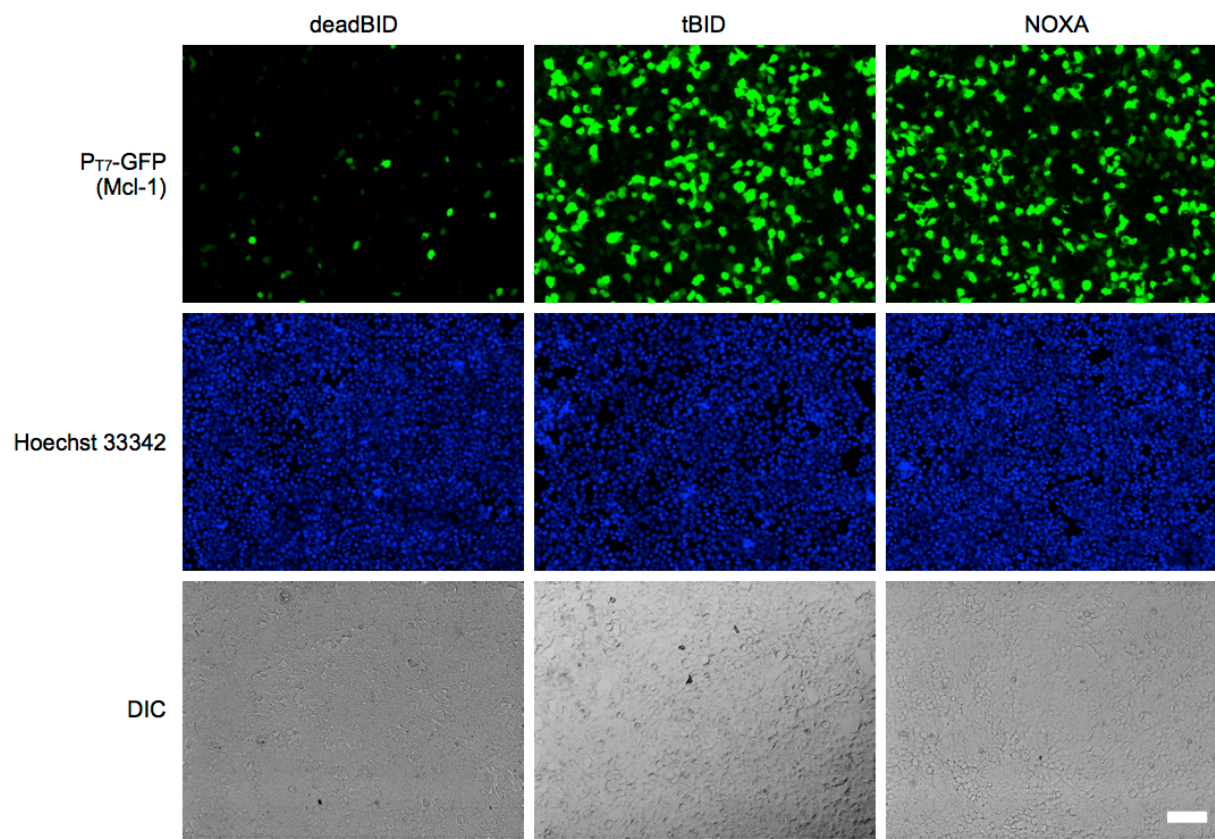

**Figure S3 | Complete imaging series from Figure 2B for Mcl-1.** HEK293T cells cotransfected with the plasmids shown in (Figure 2A) with RNAP<sub>N</sub>- BH3-only protein and Mcl-1-RNAP<sub>C</sub>. 30 h after transfection, the cells were loaded with 1  $\mu$ M Hoechst 33342 and analyzed by fluorescence microscopy. 100  $\mu$ m scale bar shown.

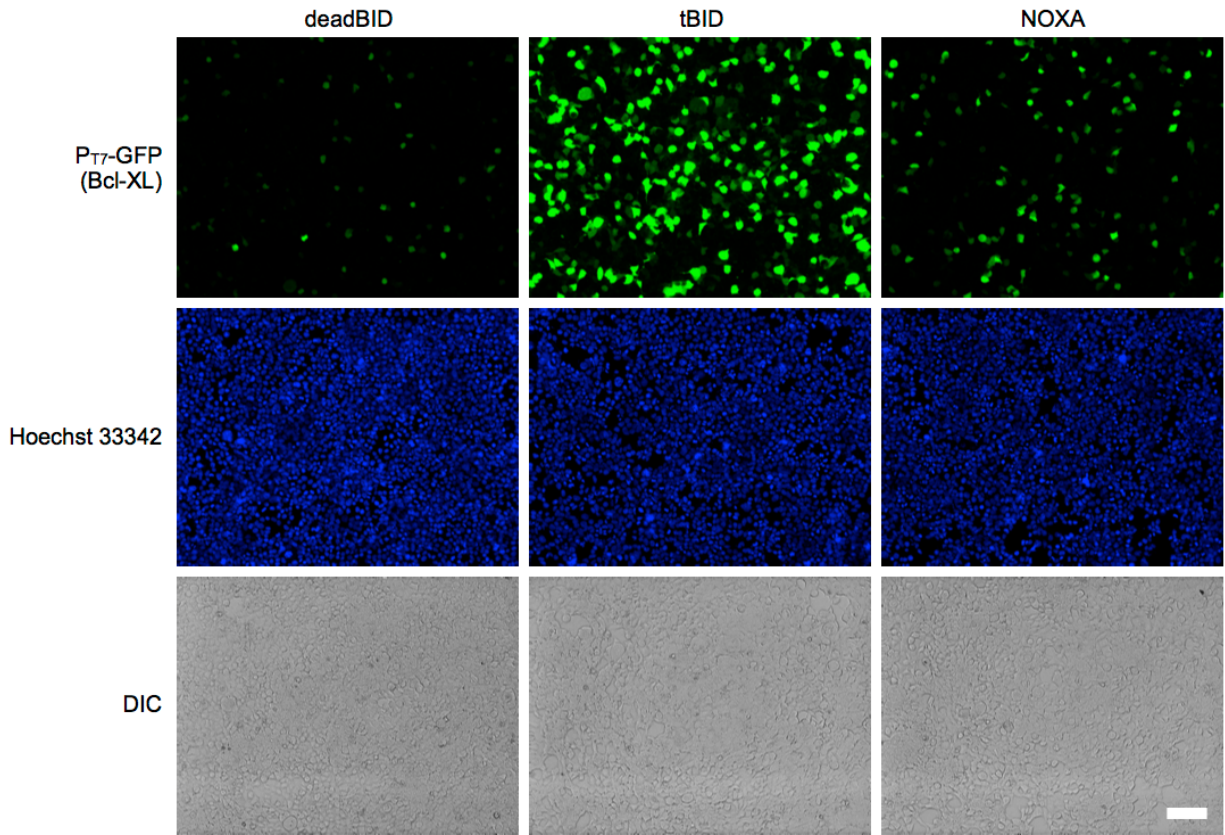

**Figure S4 | Complete imaging series from Figure 2B for Bcl-X<sub>L</sub>.** HEK293T cells cotransfected with the plasmids shown in (Figure 2A) with RNAP<sub>N</sub>-BH3-only protein and Bcl-X<sub>L</sub>-RNAP<sub>C</sub>. 30 h after transfection, the cells were loaded with 1 μM Hoechst 33342 and analyzed by fluorescence microscopy. 100 μm scale bar shown.

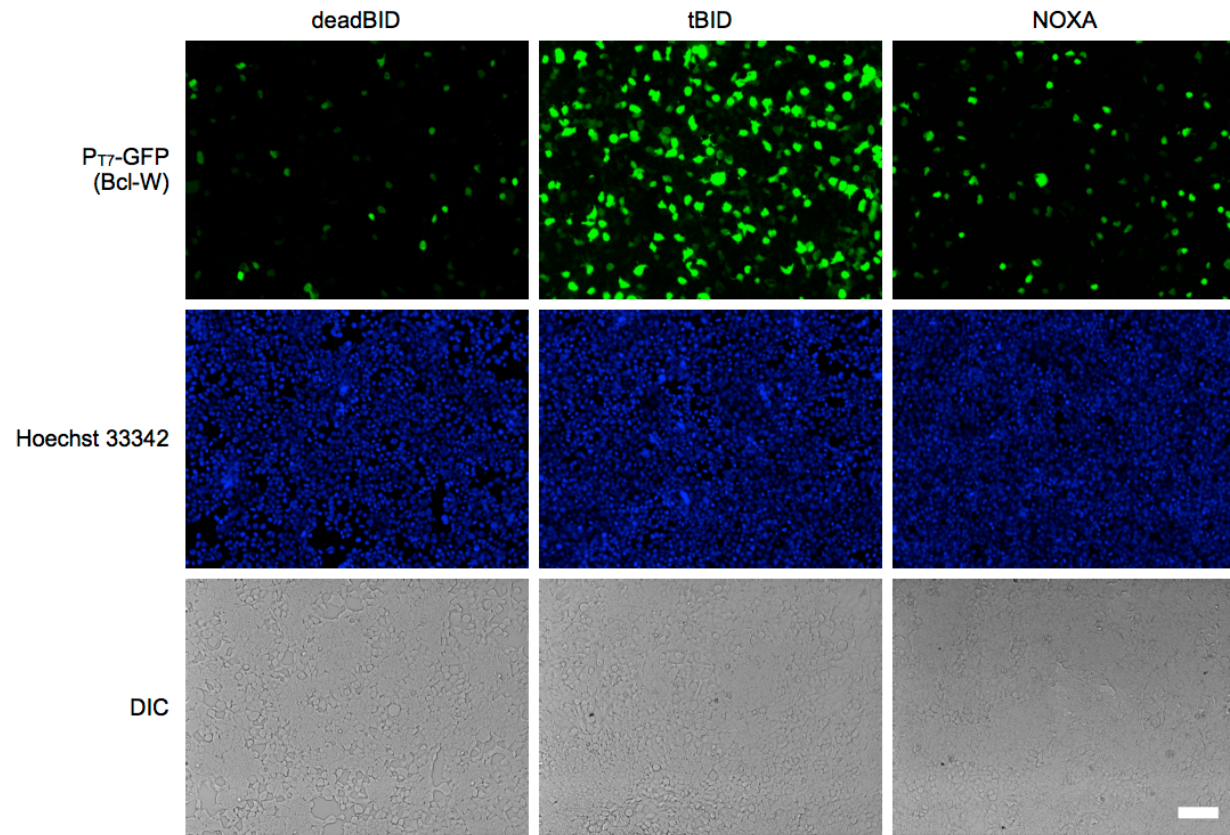

**Figure S5 | Complete imaging series from Figure 2B for Bcl-W.** HEK293T cells cotransfected with the plasmids shown in (Figure 2A) with RNAP<sub>N</sub>- BH3-only protein and Bcl-W-RNAP<sub>C</sub>. 30 h after transfection, the cells were loaded with 1  $\mu$ M Hoechst 33342 and analyzed by fluorescence microscopy. 100  $\mu$ m scale bar shown.

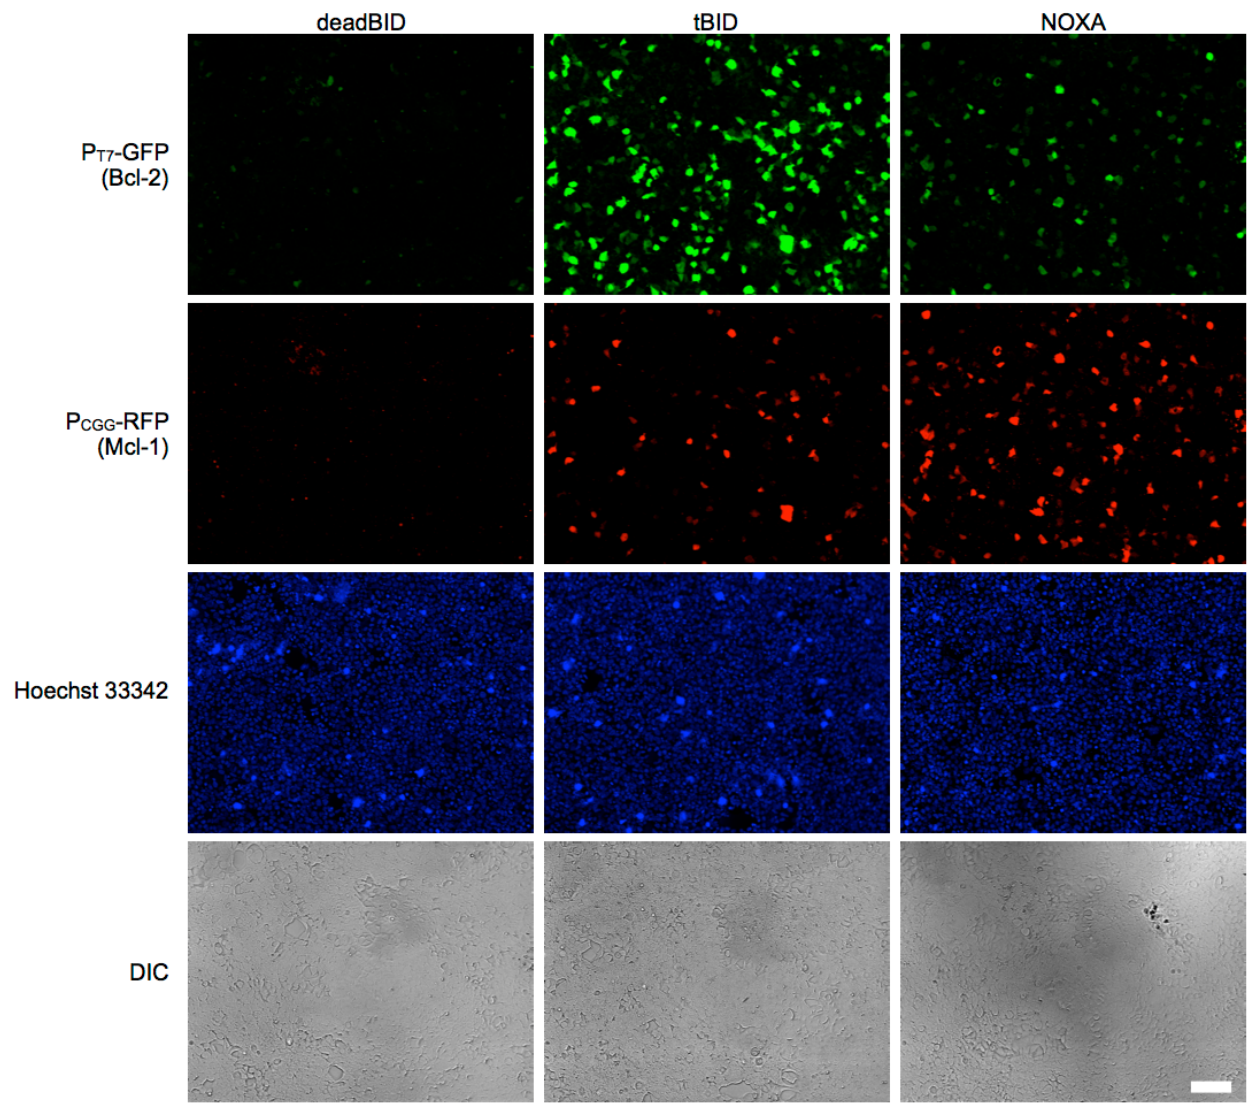

**Figure S6 | Complete imaging series from Figure 3B.** HEK293T cells cotransfected with the plasmids shown in (Figure 3A). 30 h after transfection, the cells were loaded with 1  $\mu$ M Hoechst 33342 and analyzed by fluorescence microscopy. 100  $\mu$ m scale bar shown.

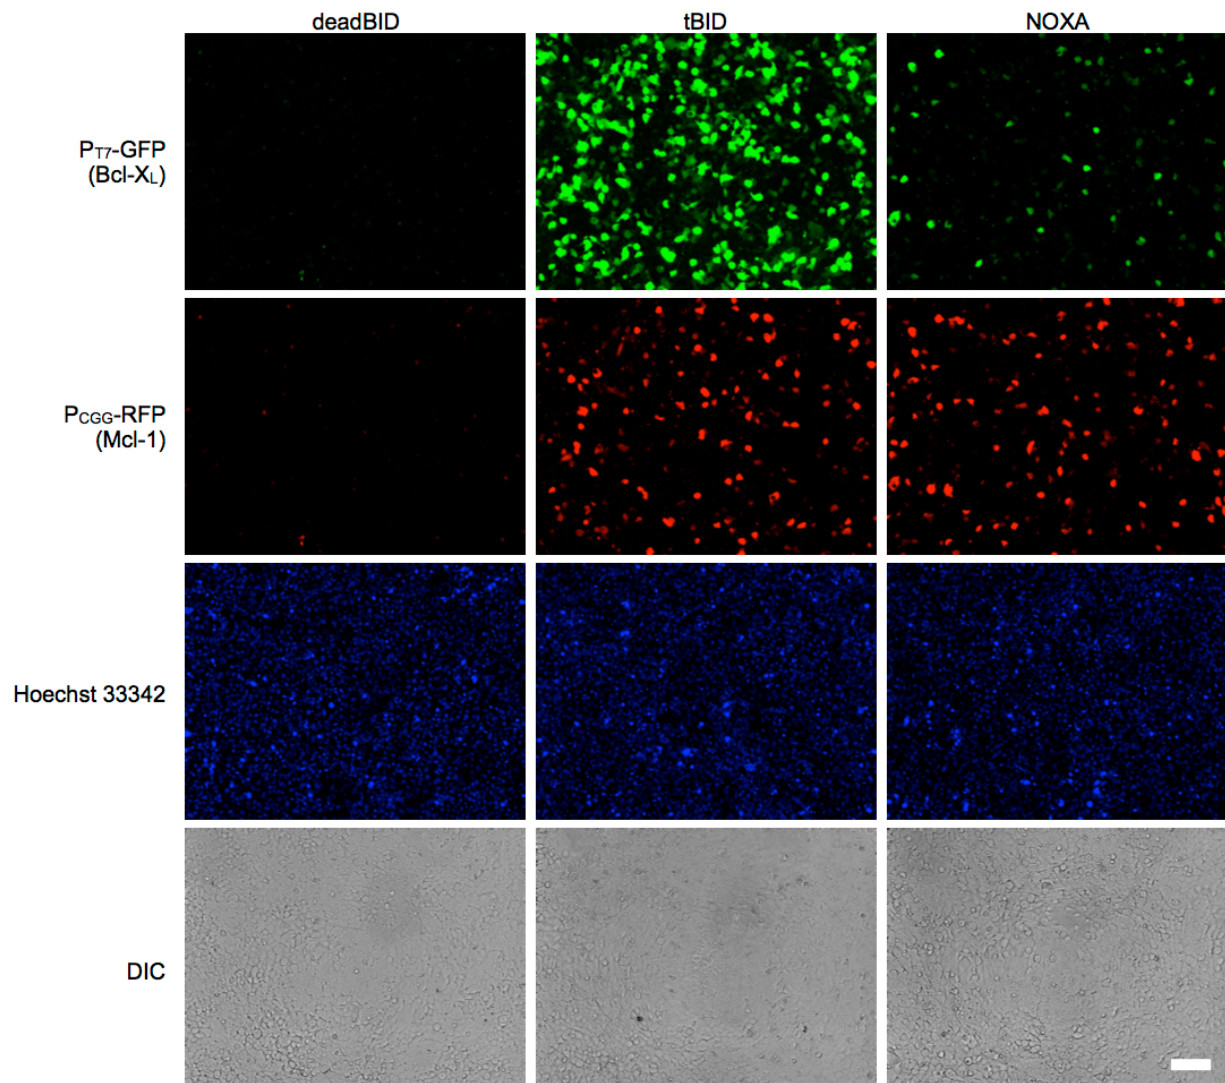

**Figure S7 | Split RNAP biosensors to monitor Bcl-X<sub>L</sub> and Mcl-1 simultaneously.** HEK293T cells cotransfected with the plasmids shown in (Figure 3A) except with Bcl-X<sub>L</sub>-T7-RNAP<sub>C</sub>. 30 h after transfection, the cells were loaded with 1 μM Hoechst 33342 and analyzed by fluorescence microscopy. 100 μm scale bar shown.

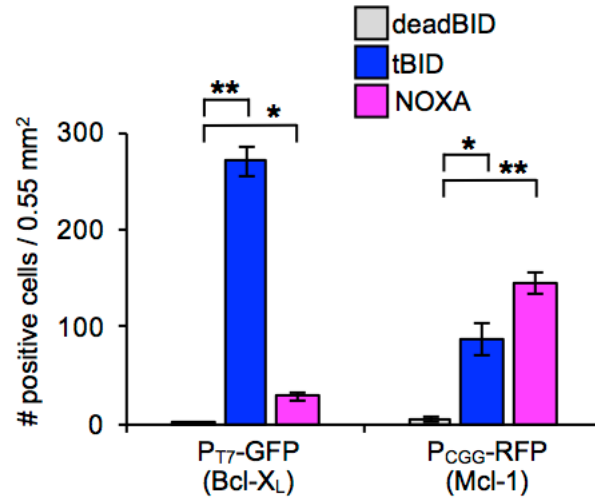

**Figure S8 | Quantification of Fig. S7.** (error bars are  $\pm$  s.e.m, n = 5). Student's *t*-test; \* $P < 0.01$ , \*\* $P < 0.001$ .

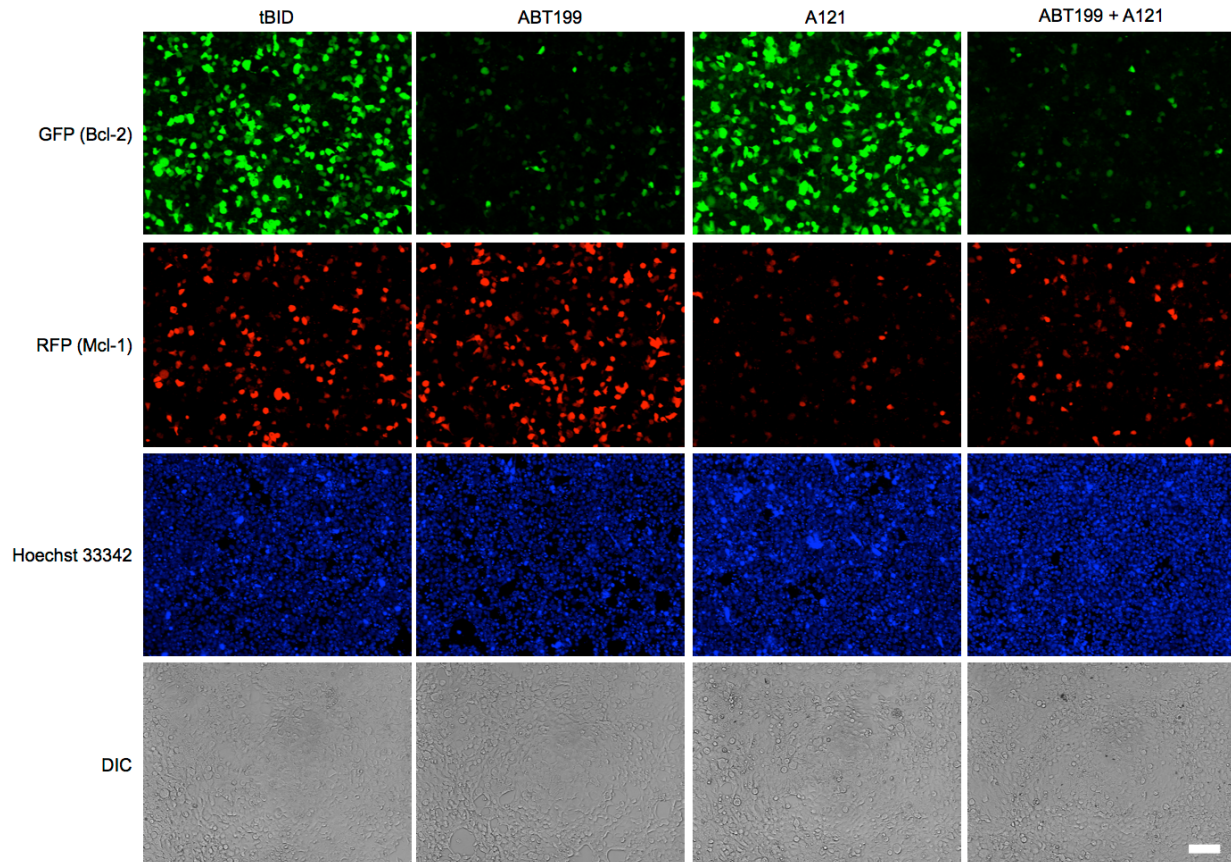

**Figure S9 | Complete imaging series from Fig. 4A.** HEK293T cells cotransfected with the plasmids shown in (Fig. 3A) along with DMSO carrier control, 0.5  $\mu$ M ABT-199, 10  $\mu$ M A1210477, or a combination of both 0.5  $\mu$ M ABT-199 and 10  $\mu$ M A1210447. 30 h after transfection, the cells were loaded with 1  $\mu$ M Hoechst 33342 and analyzed by fluorescence microscopy. 100  $\mu$ m scale bar shown.

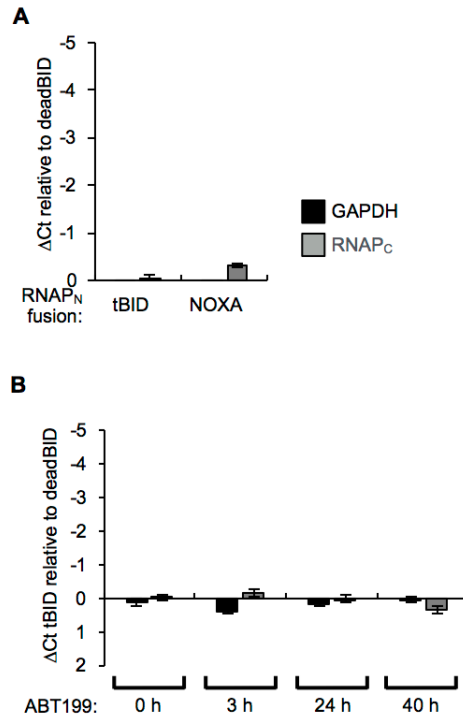

**Figure S10 | Controls for RT-qPCR analysis in Figure 7.** Controls (GAPDH and RNAP<sub>C</sub>) for experiments shown in Figure 7A and 7B shown. (A) Briefly, HEK293T cells were cotransfected with the plasmids shown in Figure 6A with the fusions indicated, grown for 40 h, lysed, and then total RNA was isolated and quantified by RT-qPCR. PCR primers were generated for GAPDH and total RNAP<sub>C</sub>. The data displayed is the delta-Ct value in comparison to cells transfected with the RNAP<sub>N</sub>-deadBID “negative control”. (B) HEK293T cells were cotransfected with the plasmids as in (A) with 0.5  $\mu$ M ABT-199 added at different time points, lysed, and then total RNA was isolated and quantified by RT-qPCR as described in (A). The data displayed is the delta-Ct value in comparison to cells transfected with the RNAP<sub>N</sub>-deadBID “negative control”. Error bars are  $\pm$  s.e.m., n = 4.
